# Supplementary material
Source: Springer Nature journal article supplement (https://www.springermedizin.de/resource/supplementary/12931_2013_1501_MOESM3_ESM.pdf/9426338)
Supplement: MOESM3 [file 9426338]

a

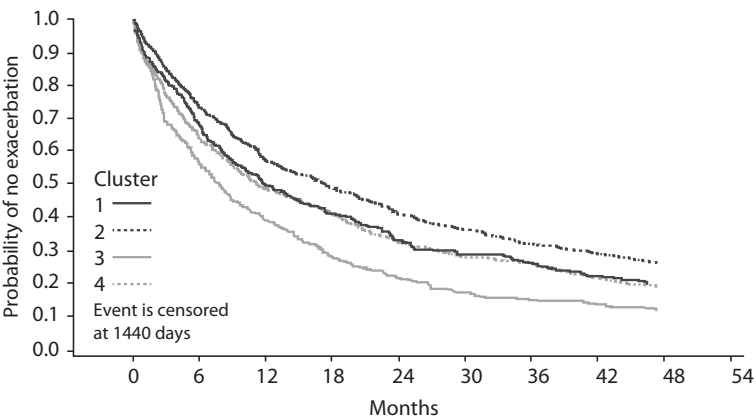

Number at risk

|           |      |     |     |     |     |     |     |     |    |
|-----------|------|-----|-----|-----|-----|-----|-----|-----|----|
| Cluster 1 | 410  | 247 | 171 | 133 | 102 | 86  | 75  | 60  | 0  |
| Cluster 2 | 1163 | 783 | 579 | 476 | 382 | 323 | 275 | 241 | 13 |
| Cluster 3 | 505  | 245 | 150 | 103 | 71  | 52  | 43  | 37  | 5  |
| Cluster 4 | 784  | 450 | 324 | 254 | 193 | 152 | 135 | 108 | 2  |

b

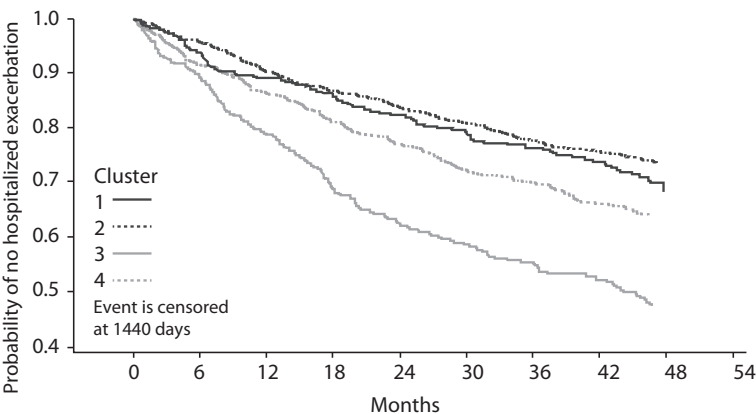

Number at risk

|           |      |      |     |     |     |     |     |     |    |
|-----------|------|------|-----|-----|-----|-----|-----|-----|----|
| Cluster 1 | 410  | 333  | 296 | 271 | 245 | 224 | 210 | 193 | 4  |
| Cluster 2 | 1163 | 1014 | 906 | 838 | 780 | 720 | 665 | 624 | 37 |
| Cluster 3 | 505  | 381  | 304 | 249 | 206 | 182 | 157 | 143 | 13 |
| Cluster 4 | 784  | 629  | 555 | 482 | 431 | 378 | 351 | 312 | 12 |
